# Supplementary material for: A simple method for the synthesis of porous polymeric vesicles and their application as MR contrast agents
Source: Royal Society of Chemistry journal article supplement (doi:10.1039/c5tb02067k), 2015-01-01
Supplement: c5tb02067k1.pdf [file c5tb02067k1.pdf]

## Supplementary Information

### **A simple method for the synthesis of porous polymeric vesicles and their application as MR contrast agent**

*Lesan Yan, Elizabeth Higbee, Andrew Tsourkas, and Zhiliang Cheng\**

Department of Bioengineering, University of Pennsylvania, Philadelphia, PA 19104

\*Corresponding author - [zcheng@seas.upenn.edu](mailto:zcheng@seas.upenn.edu)

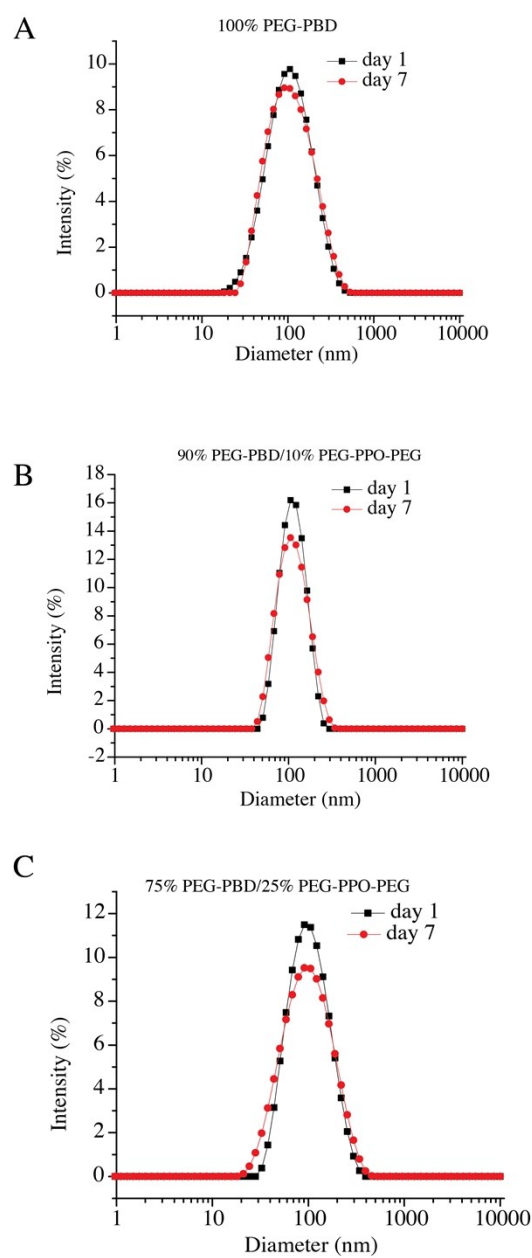

**Figure S1.** Intensity-weighted hydrodynamic diameter measurement of nanometer-sized vesicles composed of PEG-PBD and PEG-PPO-PEG at three different molar ratios. The measurements were performed over one week.

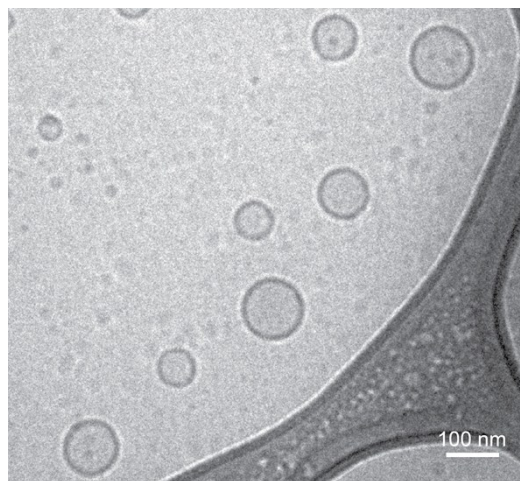

**Figure S2.** Cryo-TEM image of 75mol% PEG-PBD/25mol% PEG-PPO-PEG vesicles.

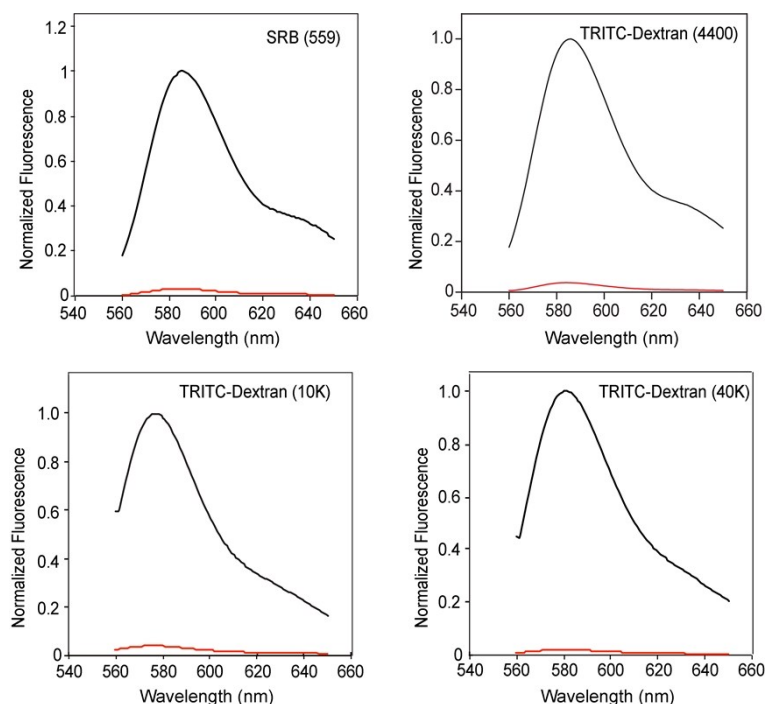

**Figure S3 .** Release and retention of encapsulated compounds including SRB, TRITC-dextran (4400), TRITC-dextran (10 K) and TRITC-dextran (40 K) within the polymeric vesicles. Vesicles were prepared with 100 mol% PEG-PBD. Following 24 h incubation in HEPES buffer (10 mM, pH 7.4), the vesicles were centrifuged on a Microcon filtering device with a 100 KDa MWCO membrane. The liquid that flowed through the filter was measured for fluorescence (red line). The fluorescence of unfiltered sample in the presence of Triton X-100 was also recorded (black line). The fluorescence intensity is normalized relative to the intensity of unfiltered sample at 585 nm

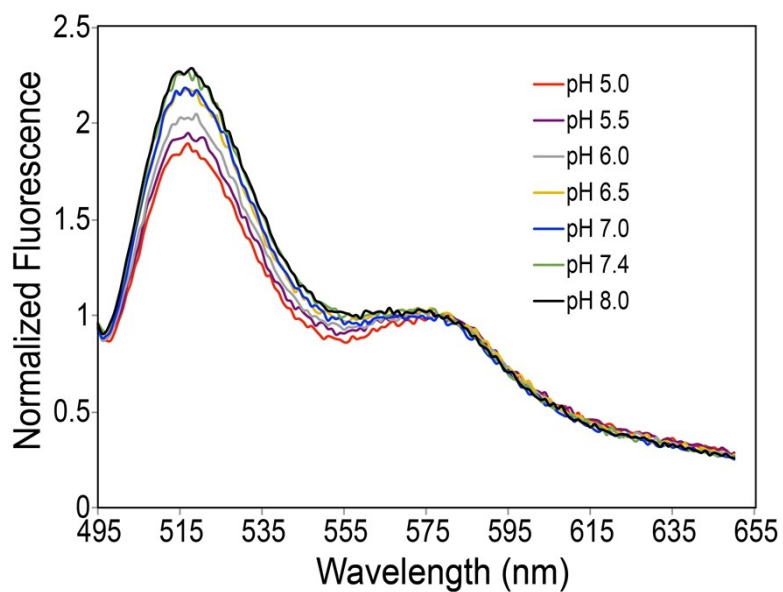

**Figure S4** . Sensitivity of FITC-dextran (MW: 59,000-77,000) encapsulated within 100 mol% PEG-PBD vesicles to pH. For ratiometric measurements, the reference dye TRITC-dextran (MW: 10,000) was also co-loaded with FITC-dextran into the aqueous interior of 100 mol% PEG-PBD vesicles.

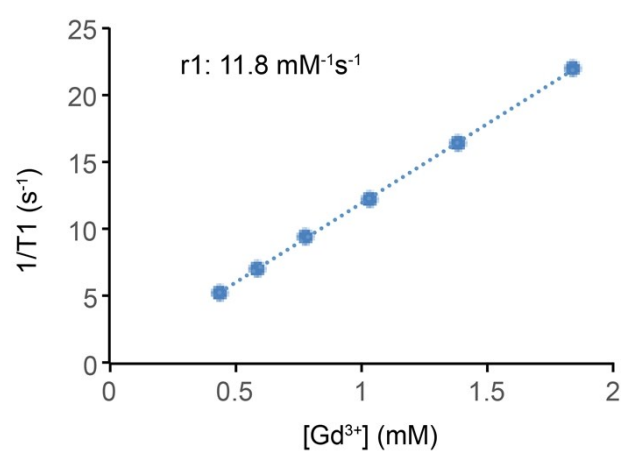

**Figure S5** . Relaxivity determination for Gd–GC conjugates.

**Table S1.** Change in the hydrodynamic diameter of nanometer-sized vesicles composed of PEG-PBD and PEG-PPO-PEG at different molar ratios for one week

|                           | Day 1         |             | Day 7         |             |
|---------------------------|---------------|-------------|---------------|-------------|
|                           | Diameter (nm) | PDI         | Diameter (nm) | PDI         |
| 100%PEG-PBD               | 119.9±1.96    | 0.231±0.002 | 125.2±2.62    | 0.239±0.002 |
| 90%PEG-PBD/10%PEG-PPO-PEG | 120.9±3.37    | 0.114±0.025 | 122.6±2.57    | 0.159±0.012 |
| 75%PEG-PBD/25%PEG-PPO-PEG | 111.0±0.45    | 0.209±0.003 | 111±1.83      | 0.225±0.003 |
